# Supplementary material
Source: Springer Nature journal article supplement (https://www.springermedizin.de/resource/supplementary/12879_2005_336_MOESM3_ESM.pdf/9448802)

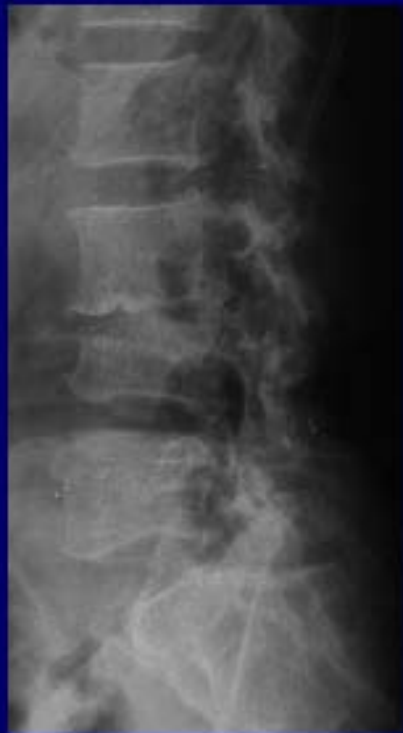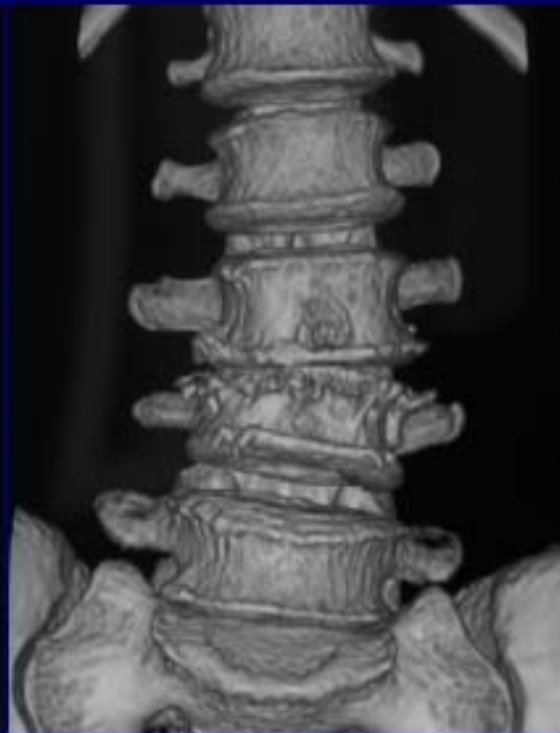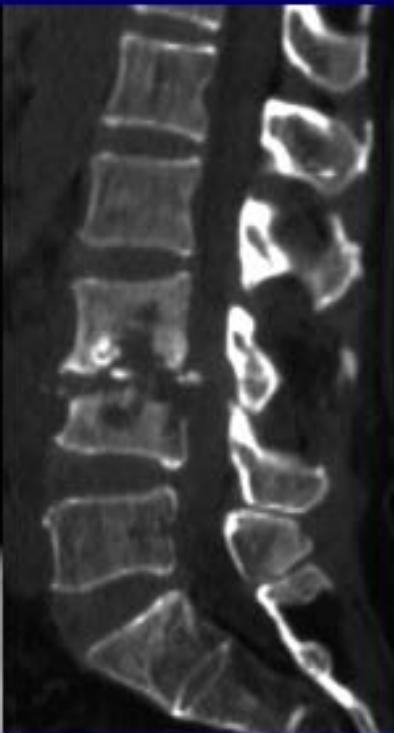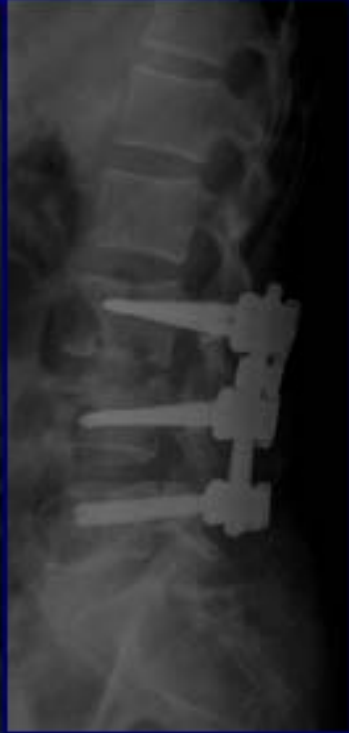

Supplement: MOESM3 [file 9448802]
